# Supplementary material for: Development of high-utilization honeycomb-like α-Ni(OH)2 for asymmetric supercapacitors with excellent capacitance
Source: Royal Society of Chemistry journal article supplement (doi:10.1039/c8ra08019d), 2018-01-01
Supplement: c8ra08019d1.pdf [file c8ra08019d1.pdf]

## Development of High Utilization Honeycomb-Like $\alpha$ -Ni(OH)<sub>2</sub> for Asymmetric Supercapacitor with Outstanding Capacitance

Shaojie Zhou,<sup>a</sup> Shizhong Cui,<sup>a</sup> Wutao Wei,<sup>a</sup> Weihua Chen<sup>\*b</sup> and Liwei Mi<sup>\*a</sup>

<sup>a</sup> Center for Advanced Materials Research, Zhongyuan University of Technology, Zhengzhou, 450007 (P.R. China); E-mail: mlwzzu@163.com

<sup>b</sup> College of Chemistry and Molecular Engineering, Zhengzhou University, Zhengzhou, 450001, P. R. China. E-mail: chenweih@zzu.edu.cn

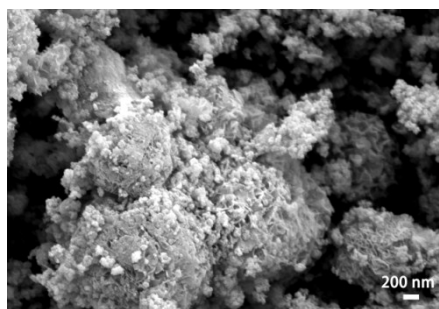

Figure S1. SEM image of pure  $\alpha$ -Ni(OH)<sub>2</sub> power.

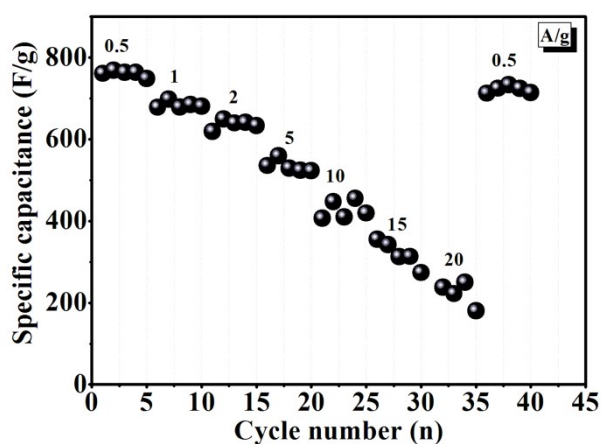

Figure S2. Rate performance of the sample pure  $\alpha$ -Ni(OH)<sub>2</sub> power in three-electrode system.

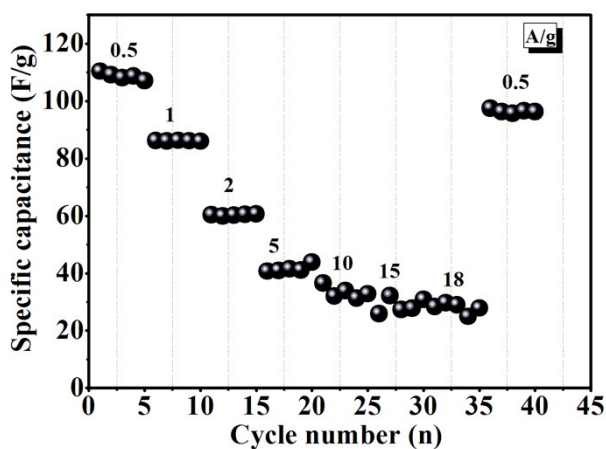

Figure S3. Rate performance of the sample pure  $\alpha$ -Ni(OH)<sub>2</sub> power in two-electrode system.

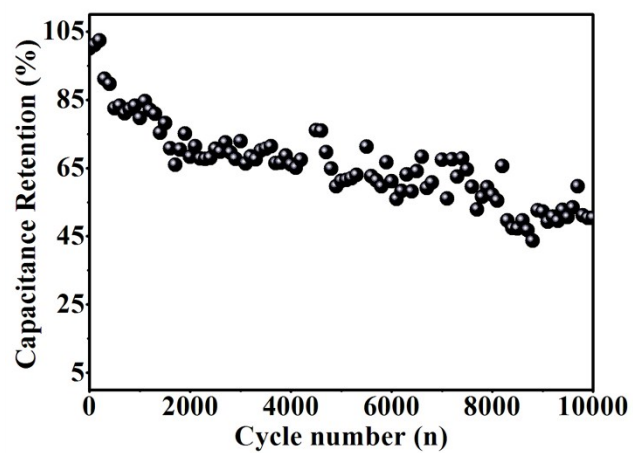

Figure S4. Cycle performance of the sample pure  $\alpha$ -Ni(OH)<sub>2</sub> powder in two-electrode system.

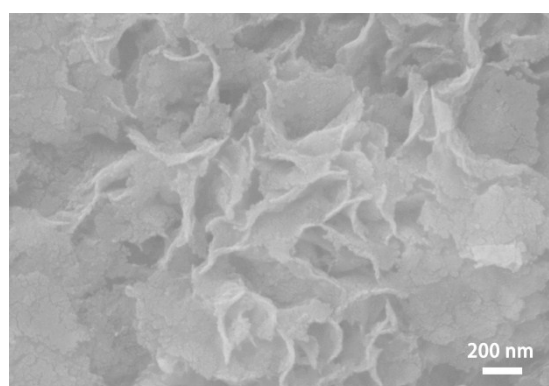

Figure S5. SEM image of the  $\alpha$ -Ni(OH)<sub>2</sub> nanosheets after 10000 cycles.
